# Supplementary material
Source: PubMed Central journal article supplement (PMC3219539)

**Supplemental Figure 1. 2D class averages of 80S dimers.** Multiple views of the ribosomal dimer in two-dimensional class averages after pre-aligning the centered particle with an 80S reference. The relative orientation of the reference particle is shown on the left. The 40S subunit is colored yellow and the 60S subunit colored blue. Landmark features are labeled as follows: bk=beak of 40S; sh=shoulder of 40S; rf=right foot of 40S; lf=left foot of 40S; L1=L1 stalk in 60S; RACK1=RACK1 protein in 40S; h=head of 40S. The 2D averages are shown to the right of the respective reference projection. The smudge in the 2D averages depicts the location of the second particle of the ribosomal dimer. The link connecting the two particles is likely flexible, or presents different rotations, so the features of the second ribosome lack detail. In all cases, however, the location of the second particle resides between the right foot of the 40S subunit and the L1 stalk of the 60S subunit.

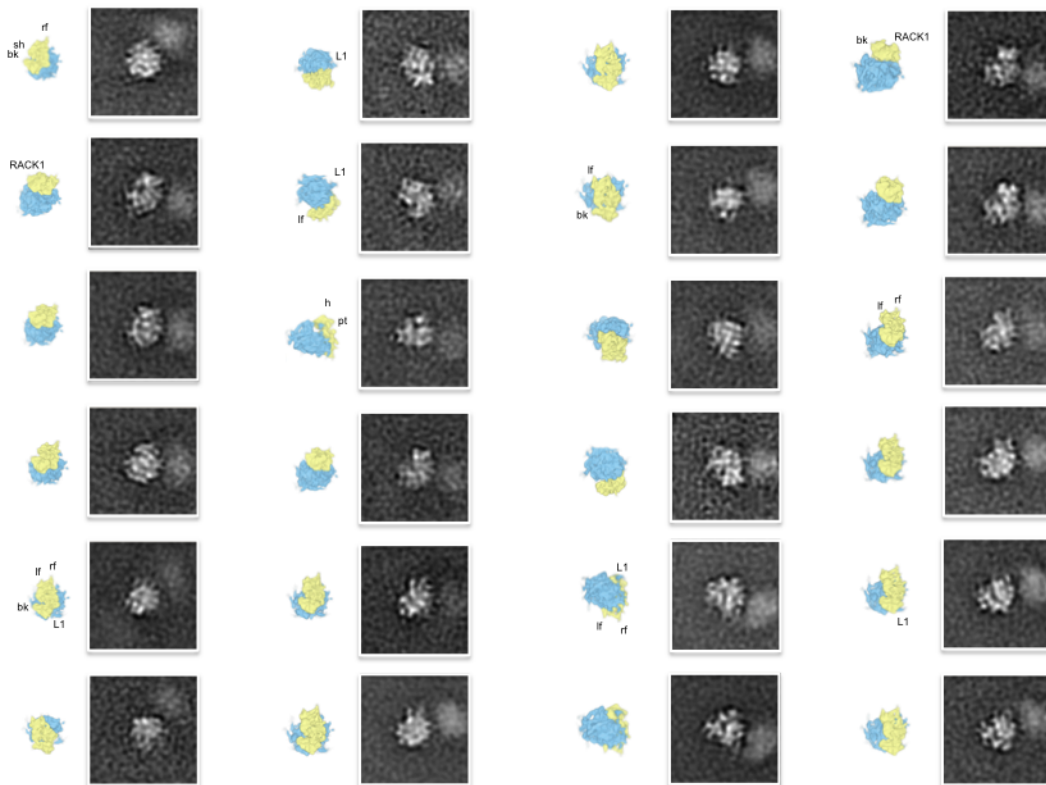

Supplement: cc1016_2691SD1.pdf [file cc1016_2691SD1.pdf]
